# Supplementary material
Source: publisher figshare collection journal article supplement (https://acs.figshare.com/ndownloader/files/4179427)
Supplement: Supplementary file 1 [file 4179427]

## Supporting Information

# Morphology Evolution of TiO<sub>2</sub> Facets and Vital Influences on Photocatalytic Activity

*Lun Pan, Ji-Jun Zou, \* Songbo Wang, Xin-Yu Liu, Xiangwen Zhang, and Li Wang*

*Key Laboratory for Green Chemical Technology of the Ministry of Education, School of Chemical Engineering and Technology, Tianjin University, Tianjin 300072 (China)*

*Fax: (+) 86-22-27892340; E-mail: [jj\\_zou@tju.edu.cn](mailto:jj_zou@tju.edu.cn)*

## Table of contents

|                  | <b>Captions</b>                                                                                                                                                                                                                                                                                                                                                                                                                                                                                                                                                                     |
|------------------|-------------------------------------------------------------------------------------------------------------------------------------------------------------------------------------------------------------------------------------------------------------------------------------------------------------------------------------------------------------------------------------------------------------------------------------------------------------------------------------------------------------------------------------------------------------------------------------|
| <b>Figure S1</b> | Transmittance spectrum of (a) UV-ref (<450 nm) and (b) UV-cut optical filter (>420 nm, Beijing Trusttech Co. Ltd.) with the wavelength. The irradiative UV and visible light sources used for photoreaction are the reflective light and transmission light for UV-ref and UV-cut, respectively.                                                                                                                                                                                                                                                                                    |
| <b>Figure S2</b> | XRD patterns of as-prepared samples.                                                                                                                                                                                                                                                                                                                                                                                                                                                                                                                                                |
| <b>Figure S3</b> | SEM images of {001} sphere calcined at 600 °C with the heating rate of (a) 10 and (b) 1 °C min <sup>-1</sup> . All scale bars are 200 nm.                                                                                                                                                                                                                                                                                                                                                                                                                                           |
| <b>Figure S4</b> | SEM images of samples used for photodegradation of charged and zwitterionic dyes, all scale bars are 500 nm. Five typical samples were prepared for the photoreaction, the abbreviation and prepared conditions are as follows: ETTB, $m_{Ti}$ = 48 mg, $t_h$ = 4 h; etched ETTB (E-ETT), $m_{Ti}$ = 48 mg, $t_h$ = 12 h; {001} sphere (Sphere), $m_{Ti}$ = 128 mg, $t_h$ = 2 h; etched {001} sphere (E-sphere), $m_{Ti}$ = 128 mg, $t_h$ = 12 h; A-sphere, alkaline-treated Sphere. The calcined samples were calcined at 600 °C and the heating rate is 10 °C min <sup>-1</sup> . |
| <b>Figure S5</b> | Photodegradation of (a) cationic RhB, (b) anionic MO, and (c) zwitterionic RhB base under UV light and (d) degradation of RhB under visible light catalyzed by as-prepared samples.                                                                                                                                                                                                                                                                                                                                                                                                 |
| <b>Figure S6</b> | Normalized reaction rate constant ( $k$ ) per unit surface area ( $S_{BET}$ ) with different photocatalysts: the calcined {001} sphere and Degussa P-25.                                                                                                                                                                                                                                                                                                                                                                                                                            |

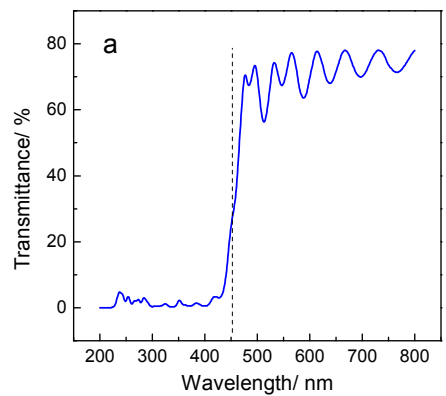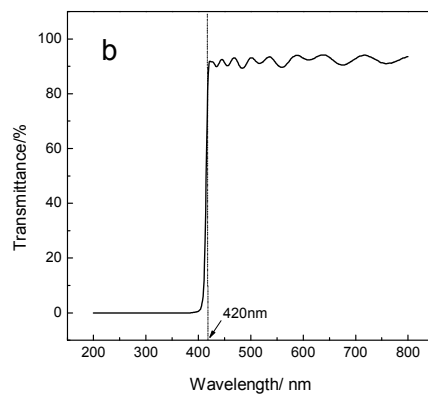

**Figure S1.** Transmittance spectrum of (a) UV-ref (<450 nm) and (b) UV-cut optical filter (>420 nm, Beijing Trusttech Co. Ltd.) with the wavelength. The irradiative UV and visible light sources used for photoreaction are the reflective light and transmission light for UV-ref and UV-cut, respectively.

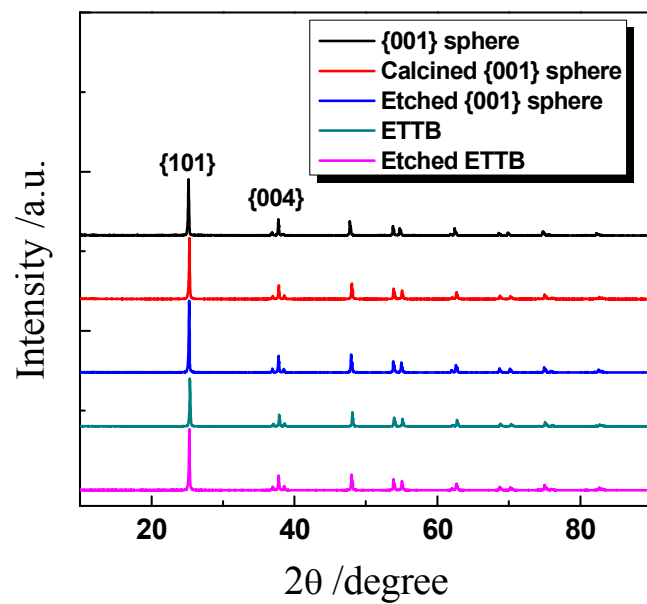

**Figure S2.** XRD patterns of as-prepared samples.

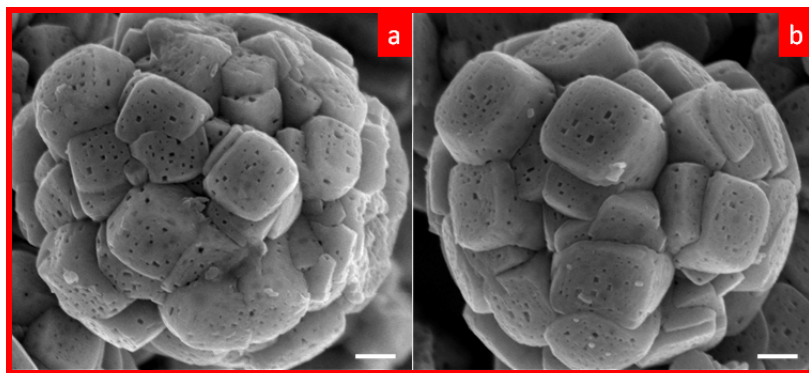

**Figure S3.** SEM images of {001} sphere calcined at 600 °C with the heating rate of (a) 10 and (b) 1 °C min<sup>-1</sup>. All scale bars are 200 nm.

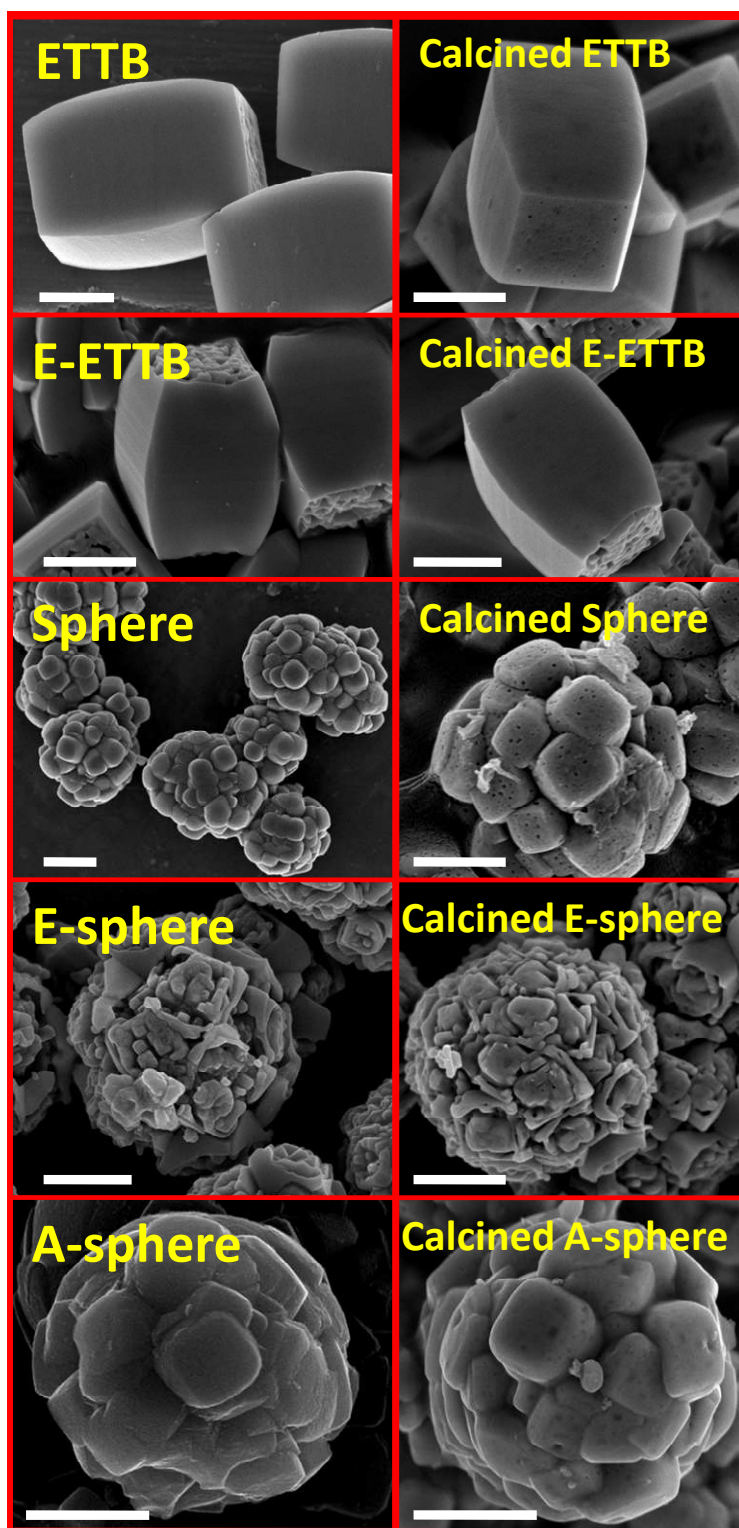

**Figure S4.** SEM images of samples used for photodegradation of charged and zwitterionic dyes, all scale bars are 500 nm. Five typical samples were prepared for the photoreaction, the abbreviation and prepared conditions are as follows: ETTB,  $m_{\text{Ti}} = 48$  mg,  $t_{\text{h}} = 4$  h; etched ETTB (E-ETT B),  $m_{\text{Ti}} = 48$  mg,  $t_{\text{h}} = 12$  h; {001} sphere (Sphere),  $m_{\text{Ti}} = 128$  mg,  $t_{\text{h}} = 2$  h; etched {001} sphere (E-sphere),  $m_{\text{Ti}} = 128$  mg,  $t_{\text{h}} = 12$  h; A-sphere, alkaline-treated Sphere. The calcined samples were calcined at 600 °C and the heating rate is 10 °C min<sup>-1</sup>.

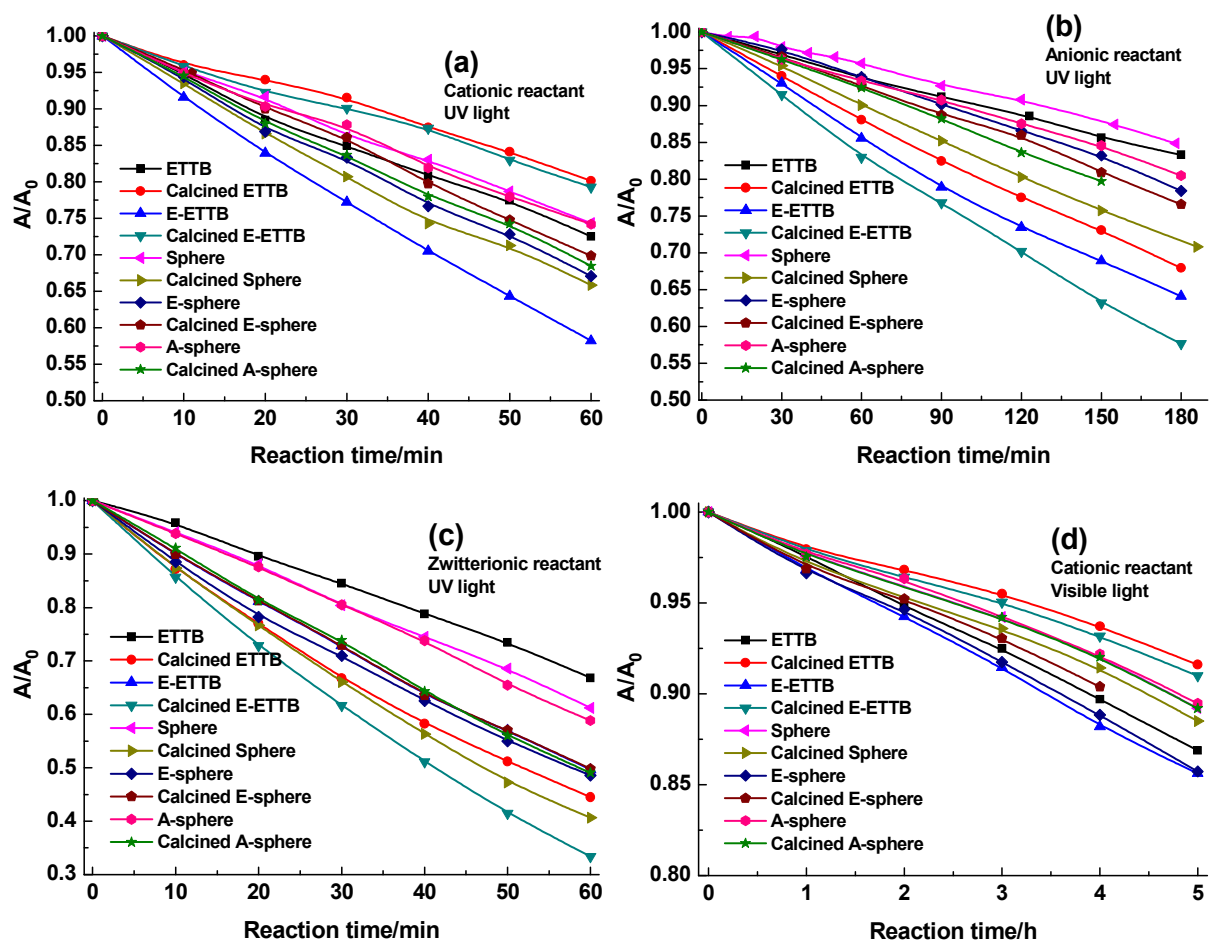

**Figure S5.** Photodegradation of (a) cationic RhB, (b) anionic MO, and (c) zwitterionic RhB base under UV light and (d) degradation of RhB under visible light catalyzed by as-prepared samples.

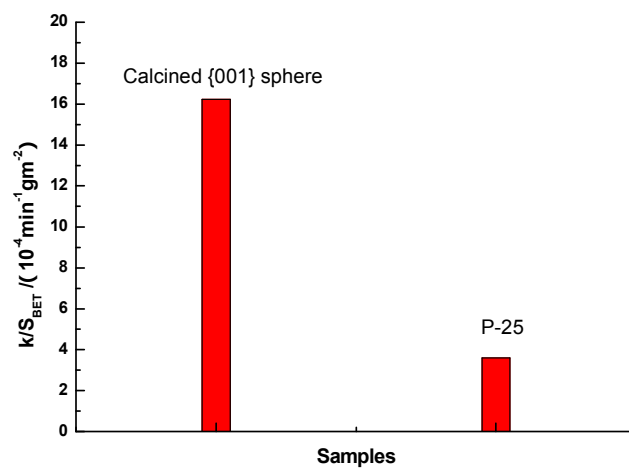

**Figure S6.** Normalized reaction rate constant ( $k$ ) per unit surface area ( $S_{\text{BET}}$ ) with different photocatalysts: the calcined {001} sphere and Degussa P-25.
